# Supplementary material for: Enhanced Exciton Effect and Singlet Oxygen Generation Triggered by Tunable Oxygen Vacancies on Bi2MoO6 for Efficient Photocatalytic Degradation of Sodium Pentachlorophenol
Source: MDPI journal article supplement (doi:10.3390/ijms232315221), 2022-12-02
Supplement: s1 [file s1]

Supplementary material

for

**Enhanced exciton effect and singlet oxygen generation triggered by tunable oxygen vacancies on Bi<sub>2</sub>MoO<sub>6</sub> for efficient photocatalytic degradation of sodium pentachlorophenol**

*Xiao Xu<sup>1,2†</sup>, Xianglong, Yang<sup>2,3†</sup>, Yunlong Tao<sup>2</sup>, Wen Zhu<sup>1</sup>, Xing Ding<sup>2</sup>, Junjiang Zhu<sup>1,\*</sup> and Hao Chen<sup>2,\*</sup>*

1. Hubei Key Laboratory of Biomass Fibers and Eco-dyeing & Finishing, College of Chemistry and Chemical Engineering, Wuhan Textile University, Wuhan 430200, China

2. College of Science, Huazhong Agricultural University, Wuhan 430070, China

3. National Reference Laboratory for Agricultural Testing (Biotoxin), Laboratory of Quality and Safety Risk Assessment for Oilseed Products (Wuhan), Key Laboratory of Detection for Mycotoxins, Quality Inspection and Test Center for Oilseed Products, Ministry of Agriculture and Rural Affairs, Oil Crops Research Institute, Chinese Academy of Agricultural Sciences, Wuhan 430062, China

\* To whom correspondence should be addressed. E-mail: [jjzhu@wtu.edu.cn](mailto:jjzhu@wtu.edu.cn); [hchenhao@mail.hzau.edu.cn](mailto:hchenhao@mail.hzau.edu.cn); Phone/Fax: +86-27-59367434

† These authors contributed equally to this work.

4 pages, 5 figures, 2 tables

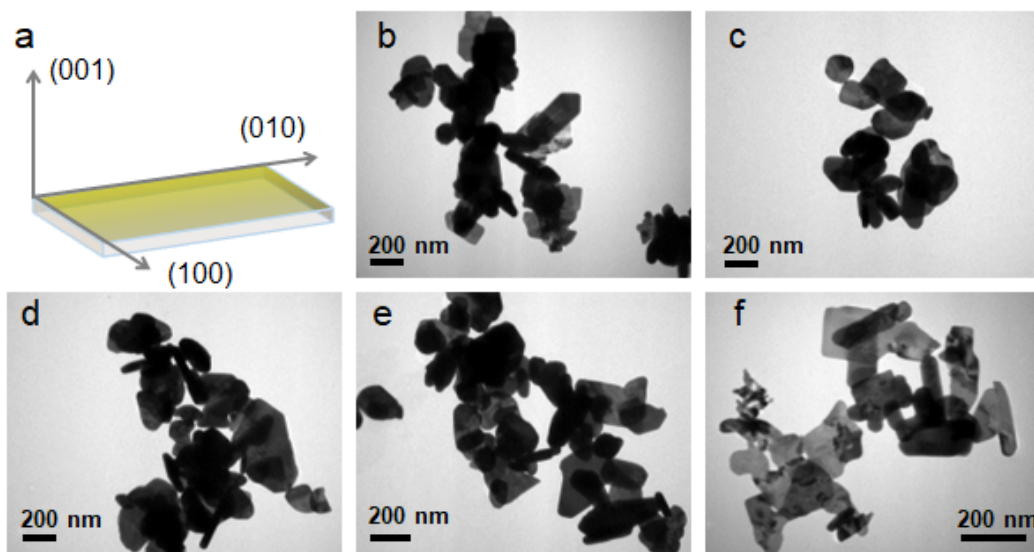

**Figure S1.** Schematic diagram of  $\text{Bi}_2\text{MoO}_6$  nanosheets (a) and TEM images of BMO-001 (b), BMO-001-200 (c), BMO-001-250 (d), BMO-001-300 (e) and BMO-001-350 (f), respectively.

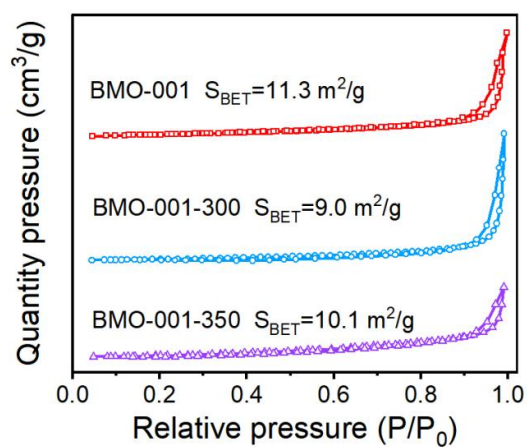

**Figure S2.** The Brunauer–Emmett–Teller (BET) surface areas of BMO-001, BMO-001-300 and BMO-001-350.

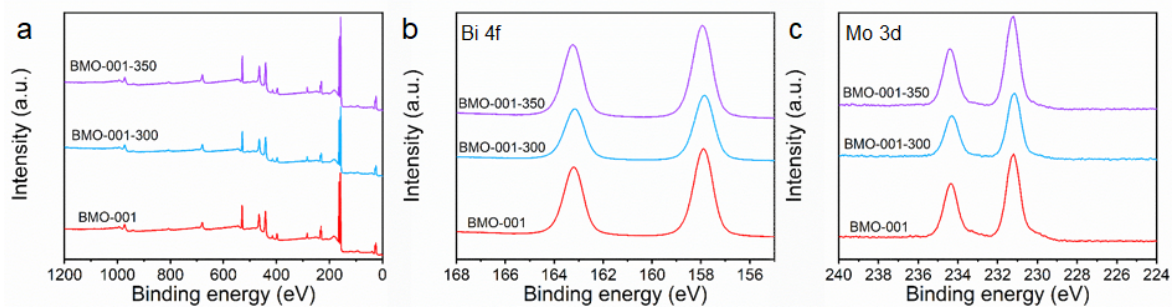

**Figure S3.** XPS spectra of BMO, BMO-001-300 and BMO-001-350 photocatalysts: (a) survey spectra, (b) Bi 4f and (c) Mo 3d.

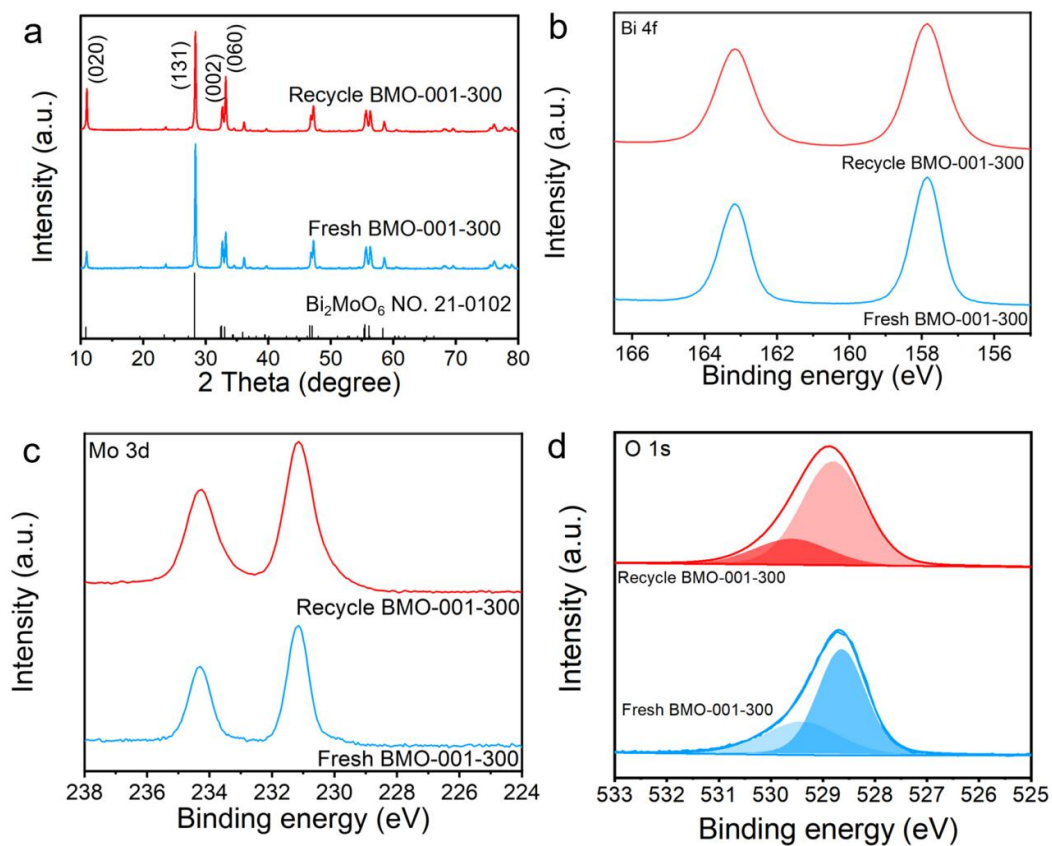

**Figure S4.** (a) XRD and XPS spectra of (b) Bi 4f, (c) Mo 3d and (d) O 1s over the fresh and recycle BMO-001-300 photocatalysts.

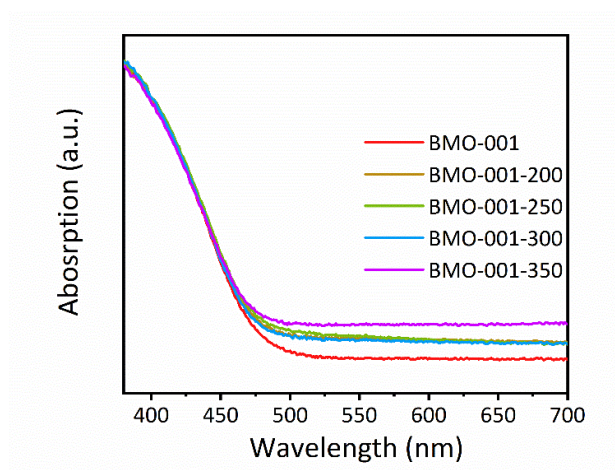

**Figure S5.** UV-vis diffuse reflectance spectra of as-prepared photocatalysts.

**Table S1.** Comparison of photocatalytic degradation of chlorophenols pollutants using different photocatalysts.

| Photocatalysts                        | Light resources                       | Pollutants concentration | Photocatalytic activity | Refs.     |
|---------------------------------------|---------------------------------------|--------------------------|-------------------------|-----------|
| g-C <sub>3</sub> N <sub>4</sub>       | 300W Xe lamp<br>$\lambda \geq 420$ nm | 10 ppm 4-CP              | 30.6% within 240 min    | [40]      |
| Au-C <sub>3</sub> N <sub>4</sub>      | 300W Xe lamp<br>$\lambda \geq 420$ nm | 10 ppm 4-CP              | 77.2% within 60 min     | [41]      |
| BiOCl-g-C <sub>3</sub> N <sub>4</sub> | 300W Xe lamp<br>$\lambda \geq 420$ nm | 10 ppm 4-CP              | 95% within 120 min      | [42]      |
| BiO <sub>2-x</sub>                    | 300W Xe lamp<br>$\lambda \geq 420$ nm | 30 ppm 4-CP              | 100% within 120 min     | [43]      |
| TiO <sub>2</sub>                      | 500W Xe lamp<br>$\lambda \geq 365$ nm | 20 ppm PCP               | 85% within 15 min       | [44]      |
| Bi <sub>2.1</sub> WO <sub>6</sub>     | 500W Xe lamp<br>$\lambda \geq 420$ nm | 10 ppm NaPCP             | 91% within 120 min      | [45]      |
| Ag/BiOCl                              | 500W Xe lamp<br>$\lambda \geq 420$ nm | 10 ppm NaPCP             | 80% within 180 min      | [46]      |
| Bi/Bi <sub>2</sub> MoO <sub>6</sub>   | 300W Xe lamp<br>$\lambda \geq 400$ nm | 10 ppm NaPCP             | 95% within 120 min      | [47]      |
| BMO-001-300                           | 300W Xe lamp<br>$\lambda \geq 400$ nm | 50 ppm NaPCP             | 80% within 60 min       | This work |

Note: 4-CP: 4-chlorophenol; PCP: Pentachlorophenol; NaPCP: Sodium pentachlorophenol.

**Table S2.** The band potential analysis of BMO-001, BMO-001-300 and BMO-001-350.

| Sample      | Ef vs. Ag/AgCl | Ef vs. NHE | VB-XPS  | VB vs. NH<br>E | Eg      | CB vs. NH<br>E |
|-------------|----------------|------------|---------|----------------|---------|----------------|
| BMO         | -0.29 V        | 0.32 V     | 2.16 eV | 2.48 V         | 2.56 eV | -0.08 V        |
| BMO-001-300 | -0.30 V        | 0.31 V     | 2.07 eV | 2.38 V         | 2.52 eV | -0.14 V        |
| BMO-001-350 | -0.34 V        | 0.27 V     | 1.66 eV | 1.93 V         | 2.51 eV | -0.58 V        |
